# Supplementary material for: NMR investigation on the thermogelation of partially hydrolysed polyacrylamide/polyethylenimine mixtures
Source: Royal Society of Chemistry journal article supplement (doi:10.1039/d2sm00996j), 2022-01-01
Supplement: d2sm00996j1.pdf [file d2sm00996j1.pdf]

## Supporting Information

### **NMR Investigation on the thermogelation of Partially Hydrolysed Polyacrylamide/Polyethylenimine mixtures**

Mohammed Abdelfetah Ghriga <sup>\*(a)</sup>

Abdelouahed Khoukh <sup>(a)</sup>

Seif El Islam Lebouachera <sup>(b)</sup>

Bruno Grassl <sup>\*(a)</sup>

<sup>(a)</sup> Université de Pau et des Pays de l'Adour, E2S UPPA, CNRS, IPREM, (Institut des Sciences Analytiques et de Physico-chimie pour l'Environnement et les matériaux), 2 avenue P. Angot, Technopole Hélioparc, 64000 Pau France.

<sup>(b)</sup> Université de Pau et des pays de l'Adour, E2S UPPA, CNRS, Total Energies, LFCR, Parc Montaury, Anglet, France.

\*Corresponding authors, email: [ghrigafatah@yahoo.com](mailto:ghrigafatah@yahoo.com)

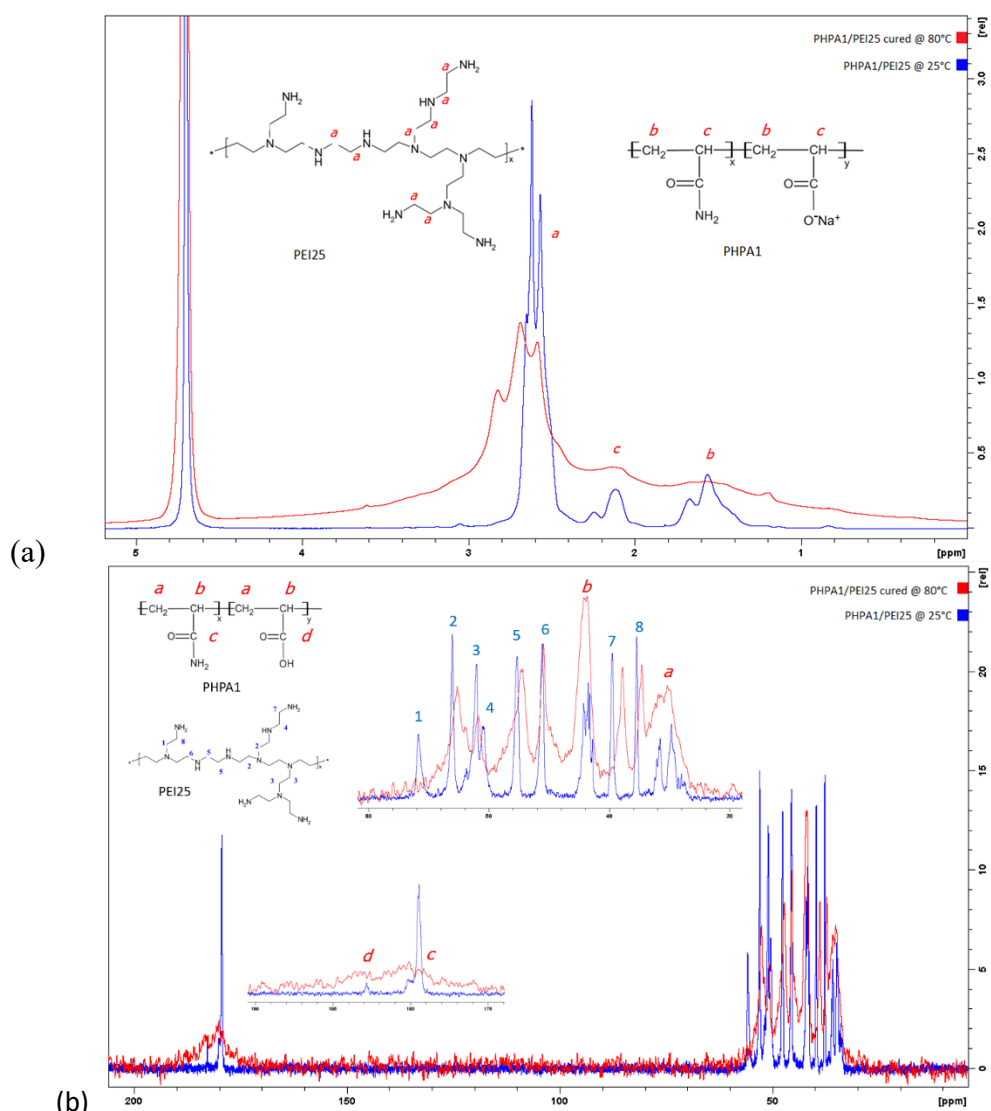

Figure S1: (a) the proton "<sup>1</sup>H" and (b) carbon "<sup>13</sup>C" NMR spectra of PHPA1/PEI25 mixture at 25°C at an initial time (t=0) and after curing at 80°C for one hour.

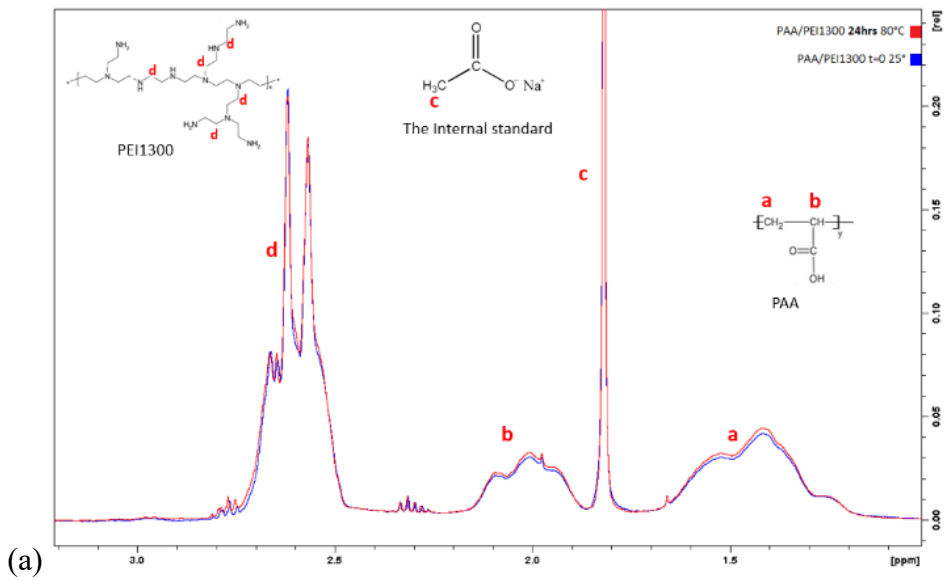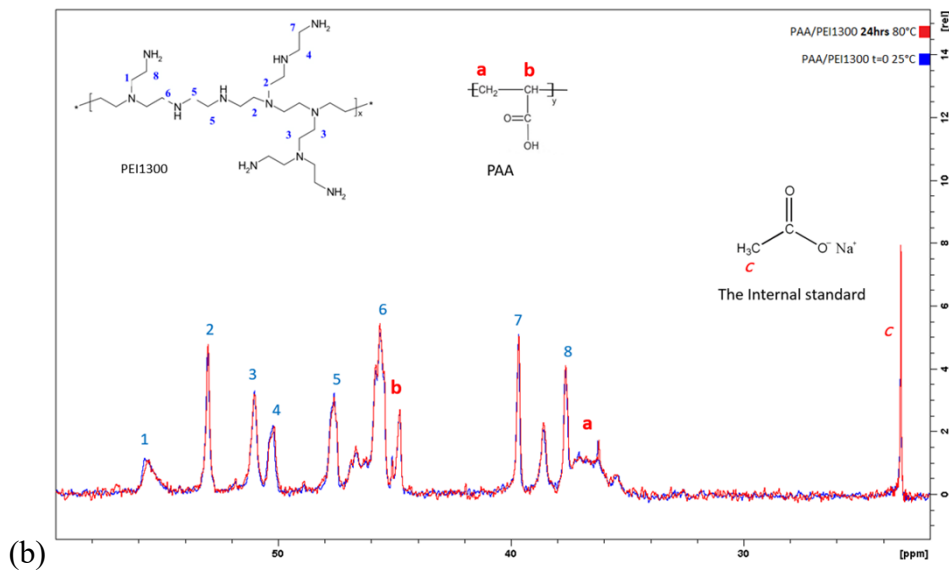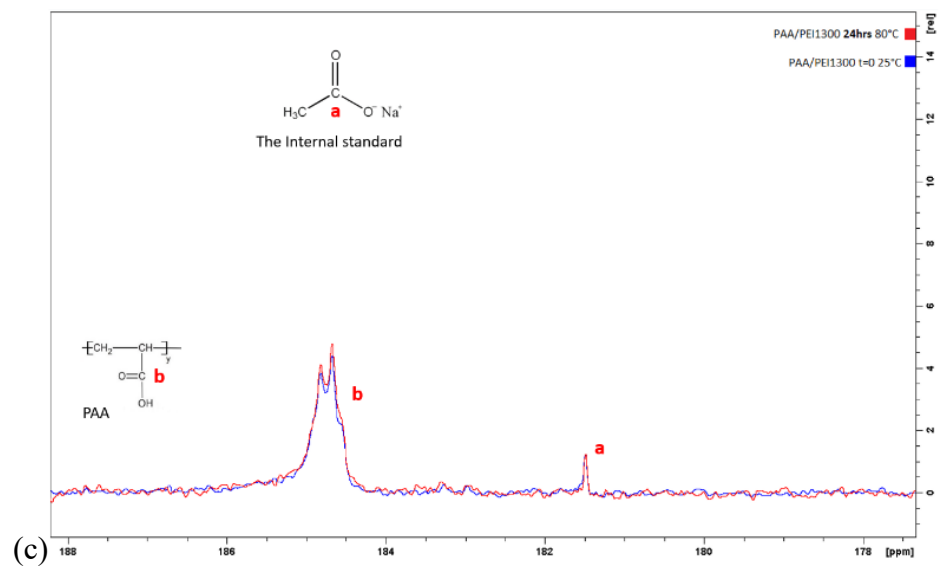

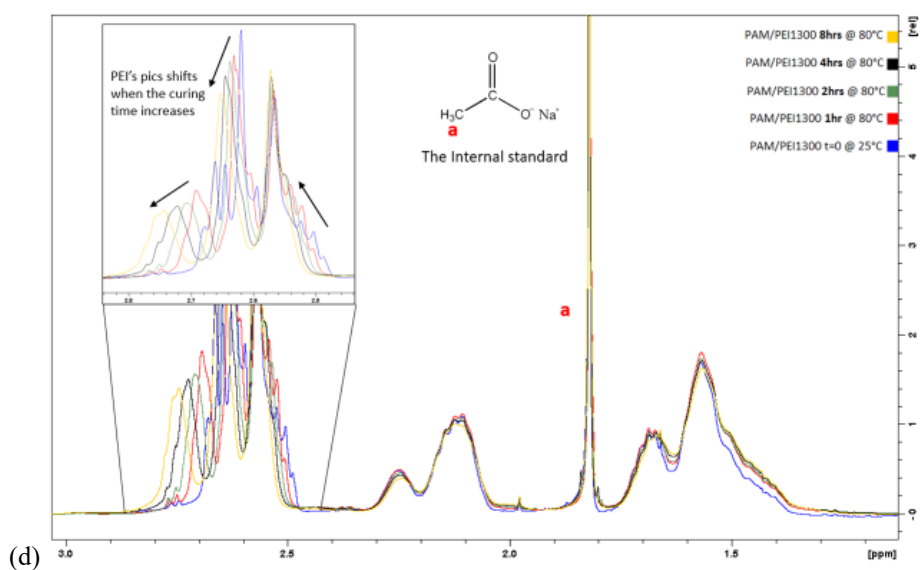

Figure S2: (a) Proton “ $^1\text{H}$ ” and (b-c) Carbon “ $^{13}\text{C}$ ” NMR spectra of PAA/PEI1300 mixture recorded at  $t=0$  ( $25^\circ\text{C}$ ) and at 24 hours (after curing at  $80^\circ\text{C}$ ), (d) Proton “ $^1\text{H}$ ” NMR spectra of PAM/PEI1300 at  $t=0$  ( $25^\circ\text{C}$ ) and after curing at  $80^\circ\text{C}$  for different times.

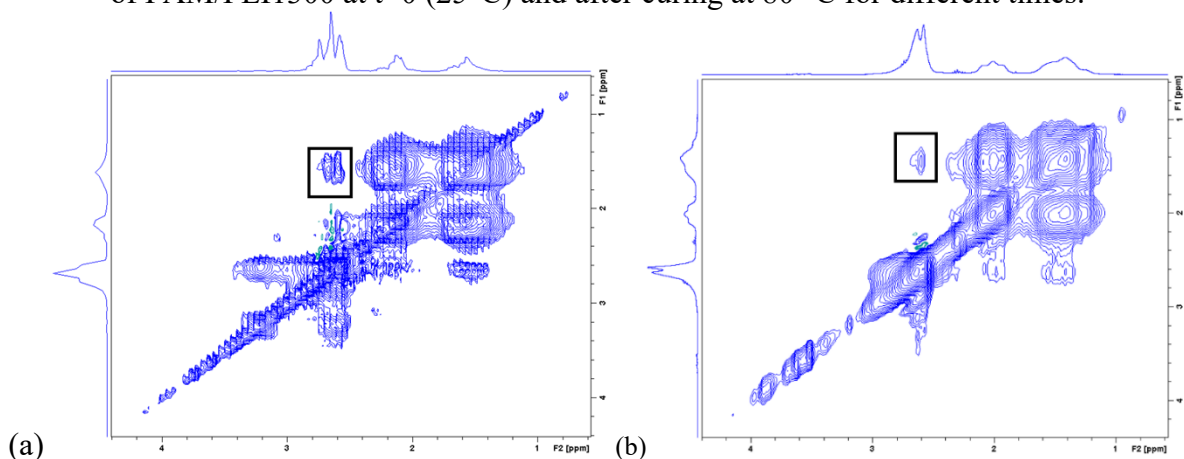

Figure S3: NMR NOESY spectra of (a) PAM/PEI1300 and (b) PAA/PEI1300 at  $25^\circ\text{C}$ .

Table S1: the acquisition parameters of the  $^1\text{H}$ -RMN and  $^{13}\text{C}$ -RMN spectra.

| Parameter               | $^1\text{H}$ -RMN | $^{13}\text{C}$ -RMN |
|-------------------------|-------------------|----------------------|
| Frequency (MHz)         | 400.13            | 100.61               |
| Acquisition time AQ (s) | 1.98              | 0.68                 |
| Spectral width SWH (Hz) | 8250              | 24038                |
| Fid size                | 32768             | 32768                |
| Number of scans         | 32                | 20480                |

**Hydrolysis degree (HD) and Branching degree (BD) equations:**

$$HD = \frac{Y}{Y + X} \quad \text{Equation SI.1}$$

Where Y is the molar concentration of the carboxylate groups in (mol/l) and X is the molar concentration of the amide groups in (mol/l).

$$BD = \frac{2D}{2D + L} \quad \text{Equation SI.2}$$

where: D are the dendritic units and L are the secondary amine linear units.
